# Supplementary material
Source: PubMed Central journal article supplement (PMC6692124)
Supplement: MCB.00200-19-s0001.pdf [file MCB.00200-19-s0001.pdf]

Table S1: Oligonucleotides used for QPCR

| Target cDNA (Rat) |     | Sequence                    |
|-------------------|-----|-----------------------------|
| <i>L32</i>        | Fw  | 5'-GAAAACCAAGCACATGCTGC-3'  |
|                   | Rev | 5'-TTGTTGCACATCAGCAGCAC-3'  |
| <i>Diras2</i>     | Fw  | 5'-TCGATCTGGAGGCTCACGGT-3'  |
|                   | Rev | 5'-GCCAAGCTCAACCACAACGT-3'  |
| <i>Ccnd1</i>      | Fw  | 5'-TCCAGAAGGGCTTCAATCTG-3'  |
|                   | Rev | 5'-GCACAACGCACTTTCTTTCC-3'  |
| <i>Nr4a2</i>      | Fw  | 5'-CTACCTGTCCAAACTGTTGG-3'  |
|                   | Rev | 5'-GGTAAGGTGTCCAGGAAAAG-3'  |
| <i>Sik1</i>       | Fw  | 5'-CGTCGGATACGTCTCTCACTC-3' |
|                   | Rev | 5'-GCGTTTTTTCCTTAGCTGCTG-3' |
| <i>Midn</i>       | Fw  | 5'-CCAGATCCGAATGTGCAA-3'    |
|                   | Rev | 5'-TGTGGCACGGTTCTCTGTC-3'   |
| <i>Pde10a</i>     | Fw  | 5'-CTAACAATGCGAGTTGCTCC-3'  |
|                   | Rev | 5'-TCACCTTTTCATCCGTCAA-3'   |
| <i>Lrrc10b</i>    | Fw  | 5'-CGAGCTTCCGGAGGAGAT-3'    |
|                   | Rev | 5'-TCCAGCTTGTTGAAGTCGAG-3'  |
| <i>C2cd4a</i>     | Fw  | 5'-CCTAGGTGGCCGAGGAAG-3'    |
|                   | Rev | 5'-CGTACCGTTTACGGCTTCTG-3'  |

|              |     |                            |
|--------------|-----|----------------------------|
| <i>Syt7</i>  | Fw  | 5'-ATTCGGCCCAGGTTCTCT-3'   |
|              | Rev | 5'-CCCTTACCAGCGAGATGCT-3'  |
| <i>Hmox1</i> | Fw  | 5'-AGGCTTTAAGCTGGTGATGG-3' |
|              | Rev | 5'-ATACCAGAAGGCCATGTCCT-3' |

Table S2: Target sequences for shRNA:

|             |                                                                |
|-------------|----------------------------------------------------------------|
| Rat PDX1    | shRNA1: GGCCTGGAAGAGCCCAGCCG<br>shRNA2: GGCGAAGAGCCGGAGCAGGA   |
| Rat NeuroD1 | shRNA1: GGCTGAATGCGGCGCTGGACA<br>shRNA2: GGCTCTGTCAGAGATCCTGCG |

Table S3: Guide sequences for CRISPR/CAS9 mediated deletion of intronic

*SYT7* enhancer

| <b>SYT7-Lrrc10B enhancer KO line</b> |        | <b>Guide sequence</b> |
|--------------------------------------|--------|-----------------------|
| <i>Syt7eΔ1</i>                       | Guide1 | ACCATTACCTTCTCGGCTT   |
|                                      | Guide2 | ACAGGGTTACTCTTTGGCGT  |
| <i>Syt7eΔ2</i>                       | Guide1 | ATCCTCGTCCAGCAGTGCAA  |
|                                      | Guide2 | GCACGCCAGACTCGGGGCGT  |
| <i>Syt7eΔ</i> screening oligos       | Fw     | CATTCTACTAGGACAGGGCC  |

|  |     |                      |
|--|-----|----------------------|
|  | Rev | CAACCCTAATGAGGCTGCAT |
|--|-----|----------------------|
